# Supplementary material for: Streptavidin-biotin system-mediated immobilization of a bivalent nanobody onto magnetosomes for separation and analysis of 3-phenoxybenzoic acid in urine
Source: Royal Society of Chemistry journal article supplement (doi:10.1039/d4ay00026a), 2024-01-01

## Supplementary Material

### **Streptavidin-Biotin System-Mediated Immobilization of Bivalent Nanobody onto Magnetosome for Separation and Analysis of 3-Phenoxybenzoic Acid in Urine**

Fang Tang, Yating Wang, Di Wang, Yayun Yang, Jiashu Chang, Huabo Sun,

Shaopeng Gu\*, Jinxin He\*

College of Veterinary Medicine, Shanxi Agricultural University, Taigu, Shanxi

030801, PR China.

\*Address correspondence to:

Dr. Shaopeng Gu, Tel: +86 0354-6288337; E-mail: shpgu@163.com.

Dr. Jinxin He, Tel: +86 0354-6288337; E-mail: hjx@sxau.edu.cn.

**Table S1** Primers used in this study.

| <b>Primers</b>             | <b>Oligonucleotide sequences (3'-5')</b>                         |
|----------------------------|------------------------------------------------------------------|
| F- <i>Sac</i> I-Nb1        | CGAGCTCATCACAAAGTGCAGTTGCAGGTGCAGCTCG<br>TGGAGTC                 |
| R-linker-Nb1               | <u>CAGAGCCACCTCCGCCTGAACCGCCTCCACCCGAGGA</u><br>GACGGTGACCTGGG   |
| F-linker-Nb2               | <u>TTCAGGCGGAGGTGGCTCTGGCGGTGGCGGTCAGGTG</u><br>CAGCTCGTGGAGTCTG |
| R- <i>Hind</i> III-Nb2     | CAAGCTTATGGTGATGGTGATGATGGACGGTGACCTG<br>GGTCCC                  |
| Overlap-F- <i>Sac</i> I    | CGAGCTCATCACAAAGTGCAGTTG                                         |
| Overlap-R- <i>Hind</i> III | CAAGCTTATGGTGATGGTGATGATGGACG                                    |

Highlight in blue indicates restriction enzyme sites. The linker sequences are underlined.

**Table S2** Physical characteristics of BMPs, BMPs-SA, and BMP-SA-Biotin-Nb2.

| <b>Types</b>      | <b>Hydrated radius<br/>(nm)</b> | <b>Zeta potential<br/>(mV)</b> | <b>Polydispersity</b> |
|-------------------|---------------------------------|--------------------------------|-----------------------|
| BMPs              | $251.4 \pm 2.254$               | $-61.37 \pm 2.03$              | $0.0247 \pm 0.008$    |
| BMP-SA            | $274.4 \pm 3.257$               | $-42.35 \pm 2.68$              | $0.0435 \pm 0.005$    |
| BMP-SA-Biotin-Nb2 | $296.5 \pm 2.46$                | $-38.64 \pm 3.11$              | $0.065 \pm 0.009$     |

**Fig. S1** TEM images of particles of BMPs (A), BMP-SA (B), and BMP-SA-Biotin-Nb2

(C).

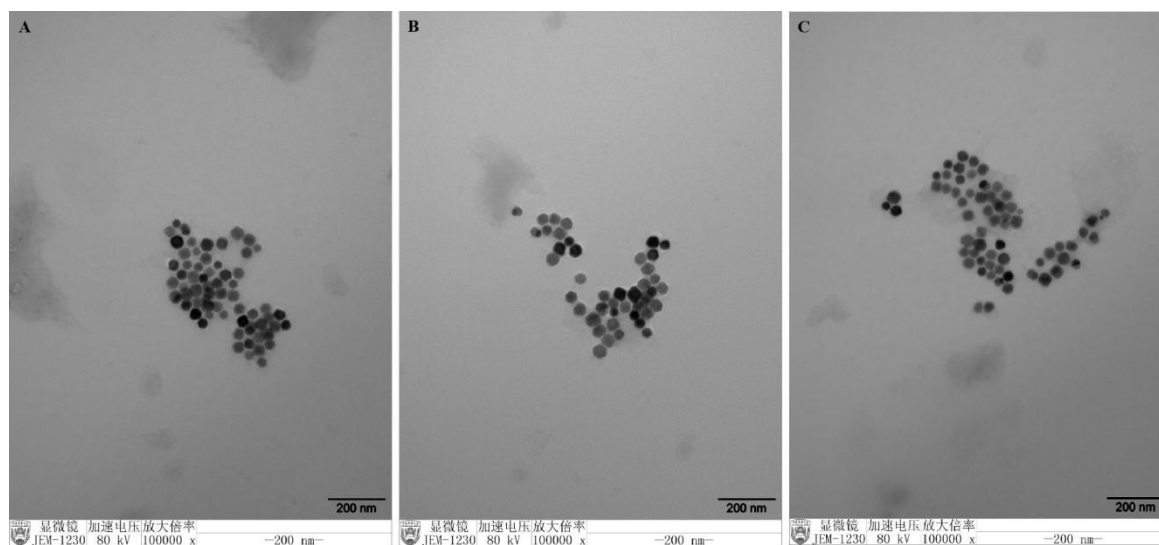

**Fig. S2** Particles size distribution of BMPs (A), BMP-SA (B), and BMP-SA-biotin-Nb2 (C).

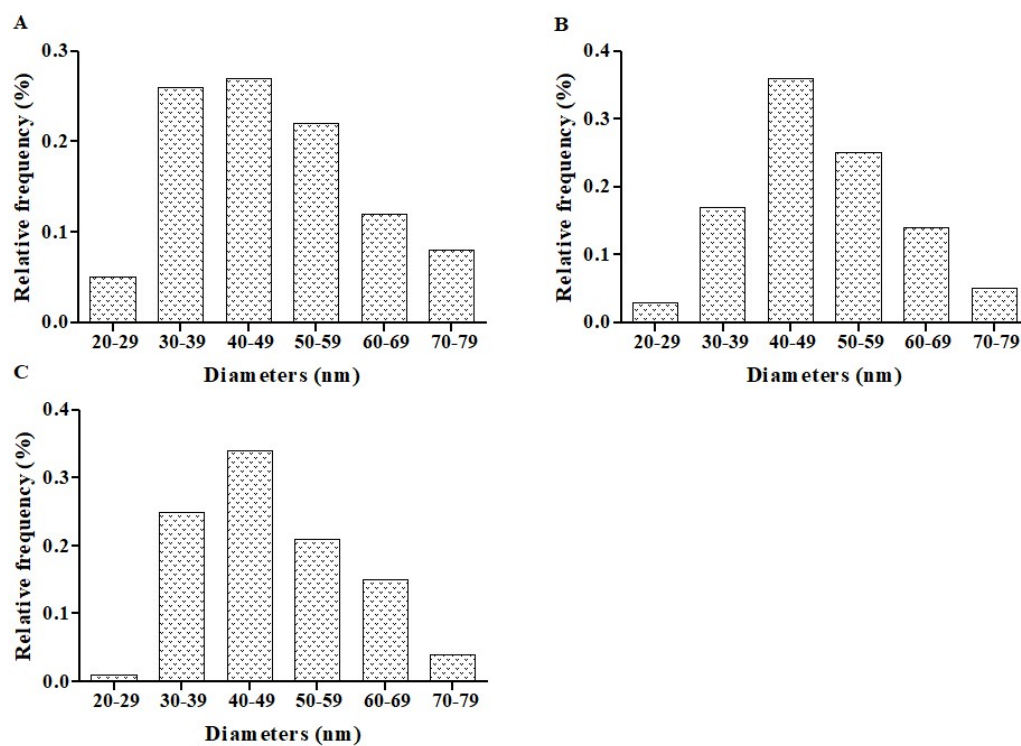

**Fig. S3.** Correlations between the BMP-SA-biotin-Nb2 based ELISA and LC-MS/MS for 3-PBA in urine samples.

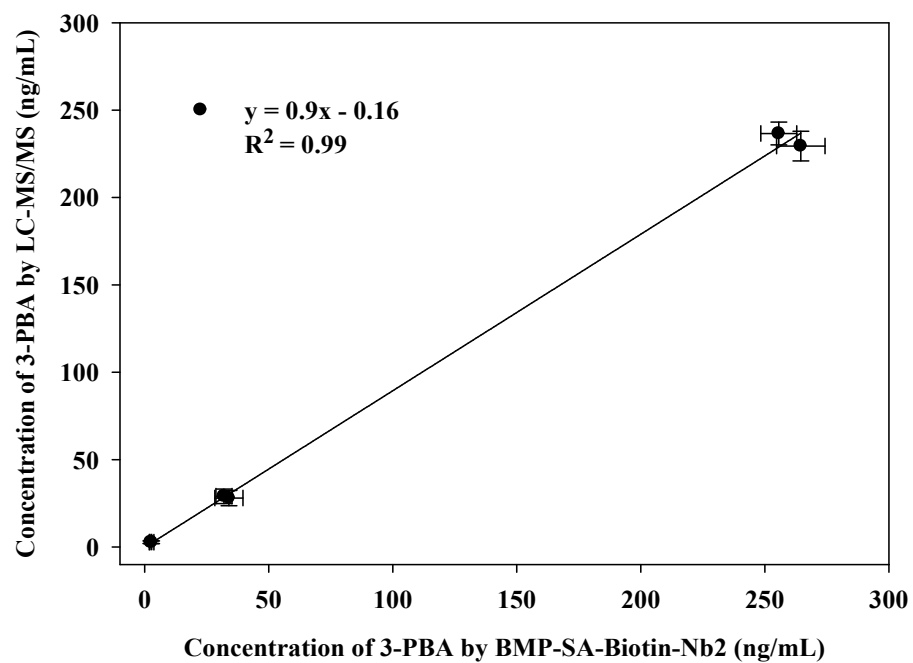

Supplement: d4ay00026a1.pdf [file d4ay00026a1.pdf]
